# Supplementary material
Source: ML conference proceedings conference paper supplement (https://openaccess.thecvf.com/content/CVPR2022/html/Li_Transformer-Empowered_Multi-Scale_Contextual_CVPR_2022_paper.html)
Supplement: Supplementary file 1 [file Li_Transformer-Empowered_Multi-Scale_Contextual_CVPR_2022_supplemental.pdf]

# Supplementary Material for CVPR 2022 paper

## Transformer-empowered Multi-scale Contextual Matching and Aggregation for Multi-contrast MRI Super-resolution

Guangyuan Li<sup>1</sup>, Jun Lv<sup>1\*</sup>, Yapeng Tian<sup>2</sup>, Qi Dou<sup>3</sup>, Chengyan Wang<sup>4</sup>, Chenliang Xu<sup>2</sup>, Jing Qin<sup>5</sup>

<sup>1</sup>School of Computer and Control Engineering, Yantai University, Yantai, China

<sup>2</sup>University of Rochester

<sup>3</sup>Department of Computer Science and Engineering, The Chinese University of Hong Kong, Hong Kong

<sup>4</sup>Human Phenome Institute, Fudan University, Shanghai, China

<sup>5</sup>Centre for Smart Health, School of Nursing, The Hong Kong Polytechnic University, Hong Kong

lgy1428275037@163.com, ljdream0710@pku.edu.cn, {yapengtian, chenliang.xu}@rochester.edu, qidou@cuhk.edu.hk, wangcy@fudan.edu.cn, harry.qin@polyu.edu.hk

### 1. The pelvic and brain Datasets

Two in-house private datasets: pelvic and brain and one public dataset: fastMRI are utilized in our experiments. For the private data, all studies have been approved by the local Institutional Review Board (IRB). The IRB asked us to protect the privacy of participants and to maintain the confidentiality of data. Since we cannot make the two datasets publicly available, we won't claim them as our contribution.

### 2. FLOPs and Parameters

We compare the FLOPs(G) and Parameters(M) of all mentioned methods in Tab. 1.

Table 1. The FLOPs(G) and Parameters(M) of all comparison methods and McMRSR.

| Algorithm     | FLOPs(G) | Params(M) |
|---------------|----------|-----------|
| EDSR [3]      | 16.275   | 1.518     |
| MCSR [5]      | 103.812  | 3.396     |
| MINet [1]     | 866.933  | 6.898     |
| MASA [4]      | 180.134  | 4.027     |
| SwinIR [2]    | 116.699  | 0.879     |
| Restormer [6] | 282.151  | 26.098    |
| McMRSR        | 258.595  | 4.080     |

For a fair comparison, we increase the number of feature maps of other methods (EDSR increased from 64 to 124, MSCR from [32, 64, 128, 256] to [48, 96, 192, 384], MASA from 64 to 68, and SwinIR from 60 to 150) to increase their FLOPs and parameters, as follows: EDSR: 243.069/5.686;

\*Corresponding author.

MSCR: 247.780/6.363; MASA: 257.318/4.546; SwinIR: 705.080/5.405. The metrics values for these adjusted methods results on fastMRI [7] dataset with UF=4 in Tab. 2.

Table 2. The PSNR, SSIM, and RMSE( $\times 10^{-2}$ ) values for these adjusted methods results on fastMRI dataset with UF=4.

| Algorithm  | PSNR               | SSIM              | RMSE              |
|------------|--------------------|-------------------|-------------------|
| EDSR [3]   | 25.05(1.18)        | 0.70(0.02)        | 5.77(1.52)        |
| MCSR [5]   | 28.74(1.42)        | 0.82(0.03)        | 3.14(1.10)        |
| MASA [4]   | 31.41(1.17)        | 0.86(0.02)        | 2.58(0.77)        |
| SwinIR [2] | 31.08(1.28)        | 0.86(0.02)        | 2.67(0.93)        |
| McMRSR     | <b>33.28(0.97)</b> | <b>0.90(0.02)</b> | <b>1.82(0.85)</b> |

The results demonstrate that McMRSR still outperforms other comparison methods, because the multi-scale contextual matching and aggregation scheme enable the target images to take full advantage of the really common information of the reference MRI.

### References

- [1] Chun-Mei Feng, Huazhu Fu, Shuhao Yuan, and Yong Xu. Multi-contrast mri super-resolution via a multi-stage integration network. In *MICCAI*, 2021.
- [2] Jingyun Liang, Jiezhong Cao, Guolei Sun, Kai Zhang, Luc Van Gool, and Radu Timofte. Swinir: Image restoration using swin transformer. In *Proceedings of the IEEE/CVF International Conference on Computer Vision*, pages 1833–1844, 2021. 1
- [3] Bee Lim, Sanghyun Son, Heewon Kim, Seungjun Nah, and Kyoung Mu Lee. Enhanced deep residual networks for single image super-resolution. In *Proceedings of the IEEE confer-*

*ence on computer vision and pattern recognition workshops*, pages 136–144, 2017.

- [4] Liying Lu, Wenbo Li, Xin Tao, Jiangbo Lu, and Jiaya Jia. Masa-sr: Matching acceleration and spatial adaptation for reference-based image super-resolution. In *Proceedings of the IEEE/CVF Conference on Computer Vision and Pattern Recognition*, pages 6368–6377, 2021.
- [5] Qing Lyu, Hongming Shan, Cole Steber, Corbin Helis, Chris Whitlow, Michael Chan, and Ge Wang. Multi-contrast super-resolution mri through a progressive network. *IEEE transactions on medical imaging*, 39(9):2738–2749, 2020.
- [6] Syed Waqas Zamir, Aditya Arora, Salman Khan, Munawar Hayat, Fahad Shahbaz Khan, and Ming-Hsuan Yang. Restormer: Efficient transformer for high-resolution image restoration. *arXiv preprint arXiv:2111.09881*, 2021. 1
- [7] Jure Zbontar, Florian Knoll, Anuroop Sriram, Tullie Murrell, Zhengnan Huang, Matthew J Muckley, Aaron Defazio, Ruben Stern, Patricia Johnson, Mary Bruno, et al. fastmri: An open dataset and benchmarks for accelerated mri. *arXiv preprint arXiv:1811.08839*, 2018. 1
